# Supplementary material for: Docosapentaenoic acid and lung cancer risk: A Mendelian randomization study
Source: PubMed Central journal article supplement (PMC6488117; doi:10.1002/cam4.2018), 2019-02-11
Supplement: CAM4-8-1817-s001.pdf [file CAM4-8-1817-s001.pdf]

# **Docosapentaenoic Acid and Lung Cancer Risk: a Mendelian Randomisation Study (Supplementary Materials)**

## **Contents:**

### **Supplementary Figures**

**Fig. S1.** Forest plot of single nucleotide polymorphisms (SNPs) associated with DPA and their risk of lung adenocarcinoma.

**Fig. S2.** Scatter plot of SNPs associated with DPA and their risk of lung adenocarcinoma.

**Fig. S3.** Leave-one-out of SNPs associated with DPA and their risk of lung adenocarcinoma.

**Fig. S4.** Forest plot of SNPs associated with DPA and their risk of squamous cell lung cancer.

**Fig. S5.** Scatter plot of SNPs associated with DPA and their risk of squamous cell lung cancer.

**Fig. S6.** Leave-one-out of SNPs associated with DPA and their risk of squamous cell lung cancer.

**Fig. S7.** Forest plot of SNPs associated with lung cancer and their risk of DPA.

**Fig. S8.** Scatter plot of SNPs associated with lung cancer and their risk of DPA.

**Fig. S9.** Leave-one-out of SNPs associated with lung cancer and their risk of DPA.

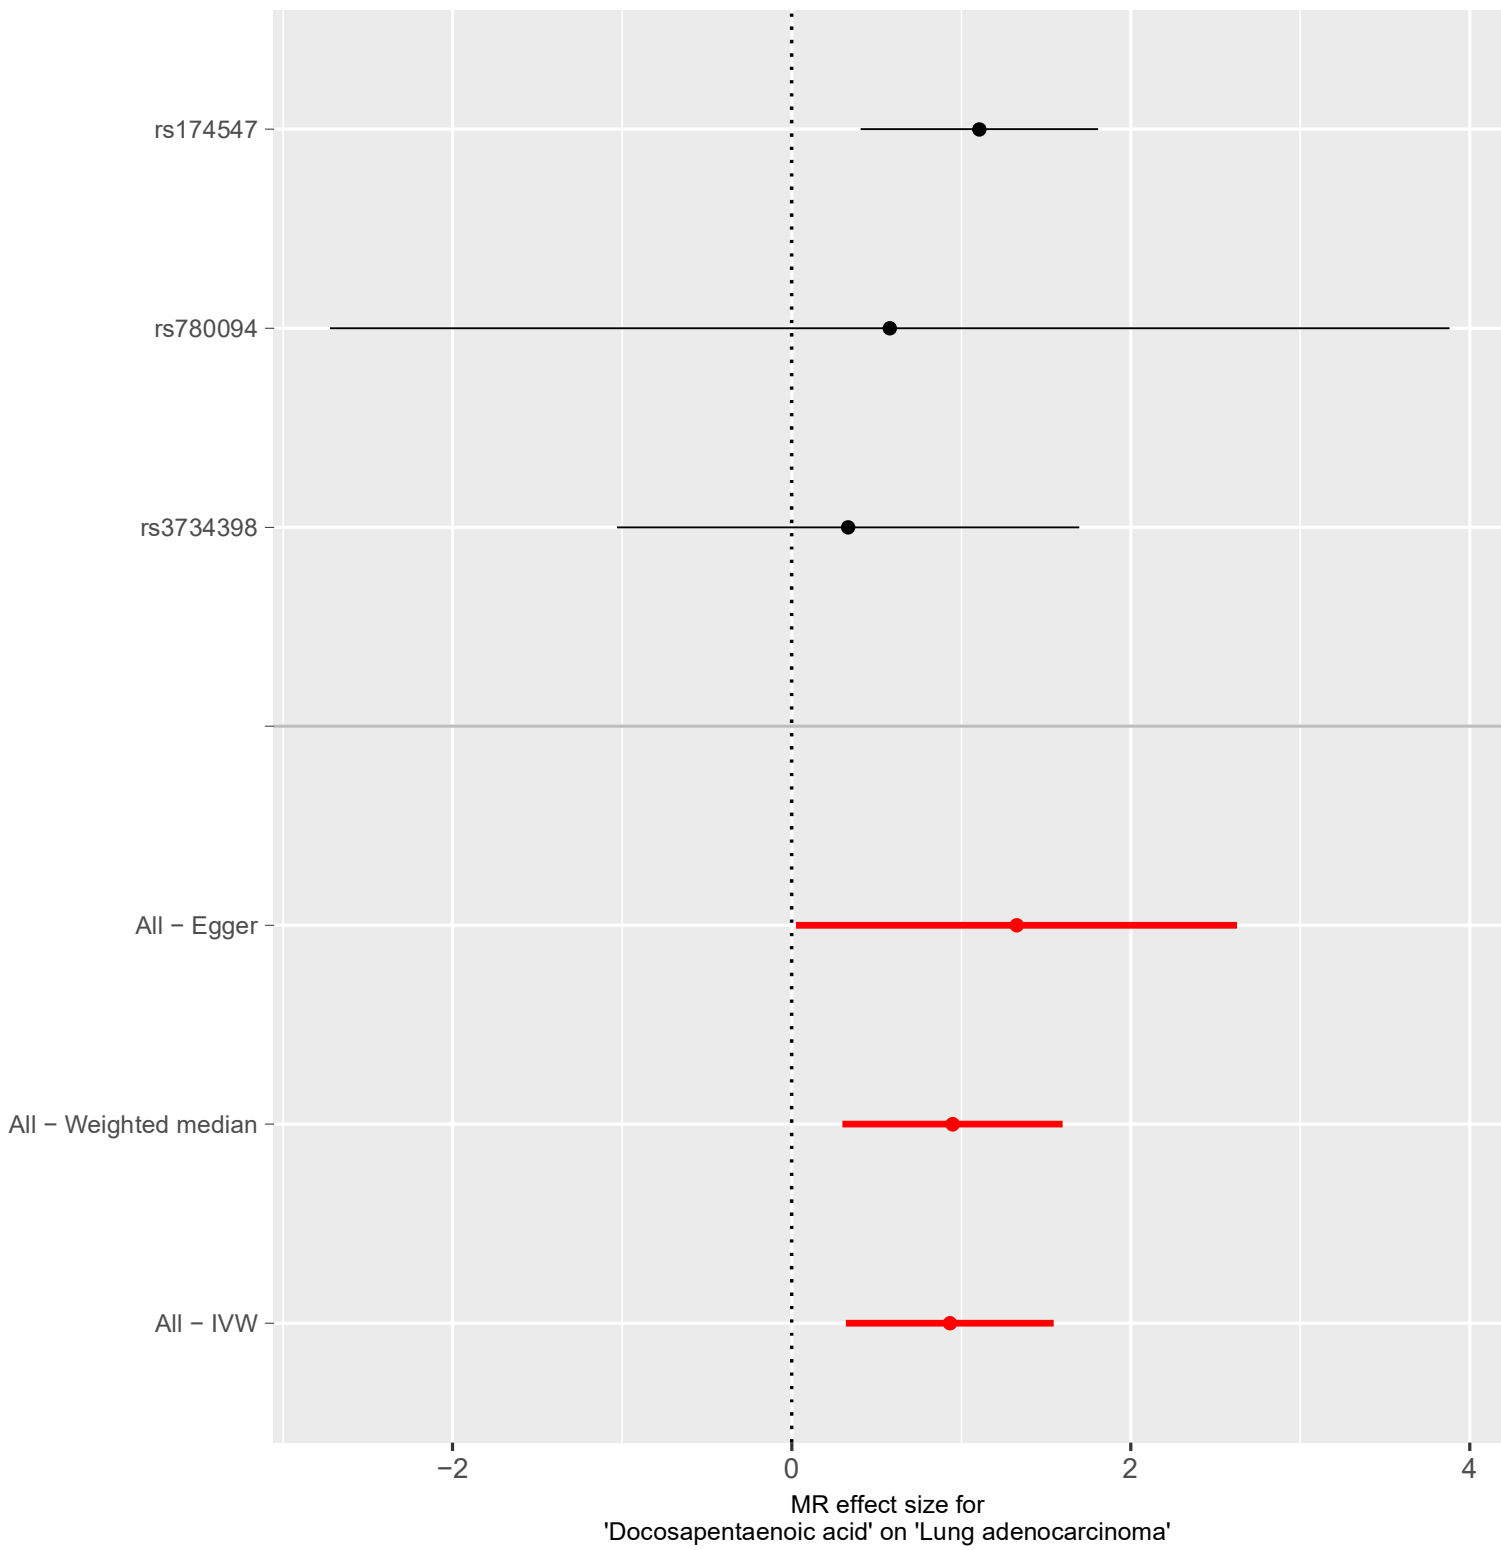

**Fig. S1.** Forest plot of single nucleotide polymorphisms (SNPs) associated with docosapentaenoic acid (DPA) and their risk of lung adenocarcinoma.

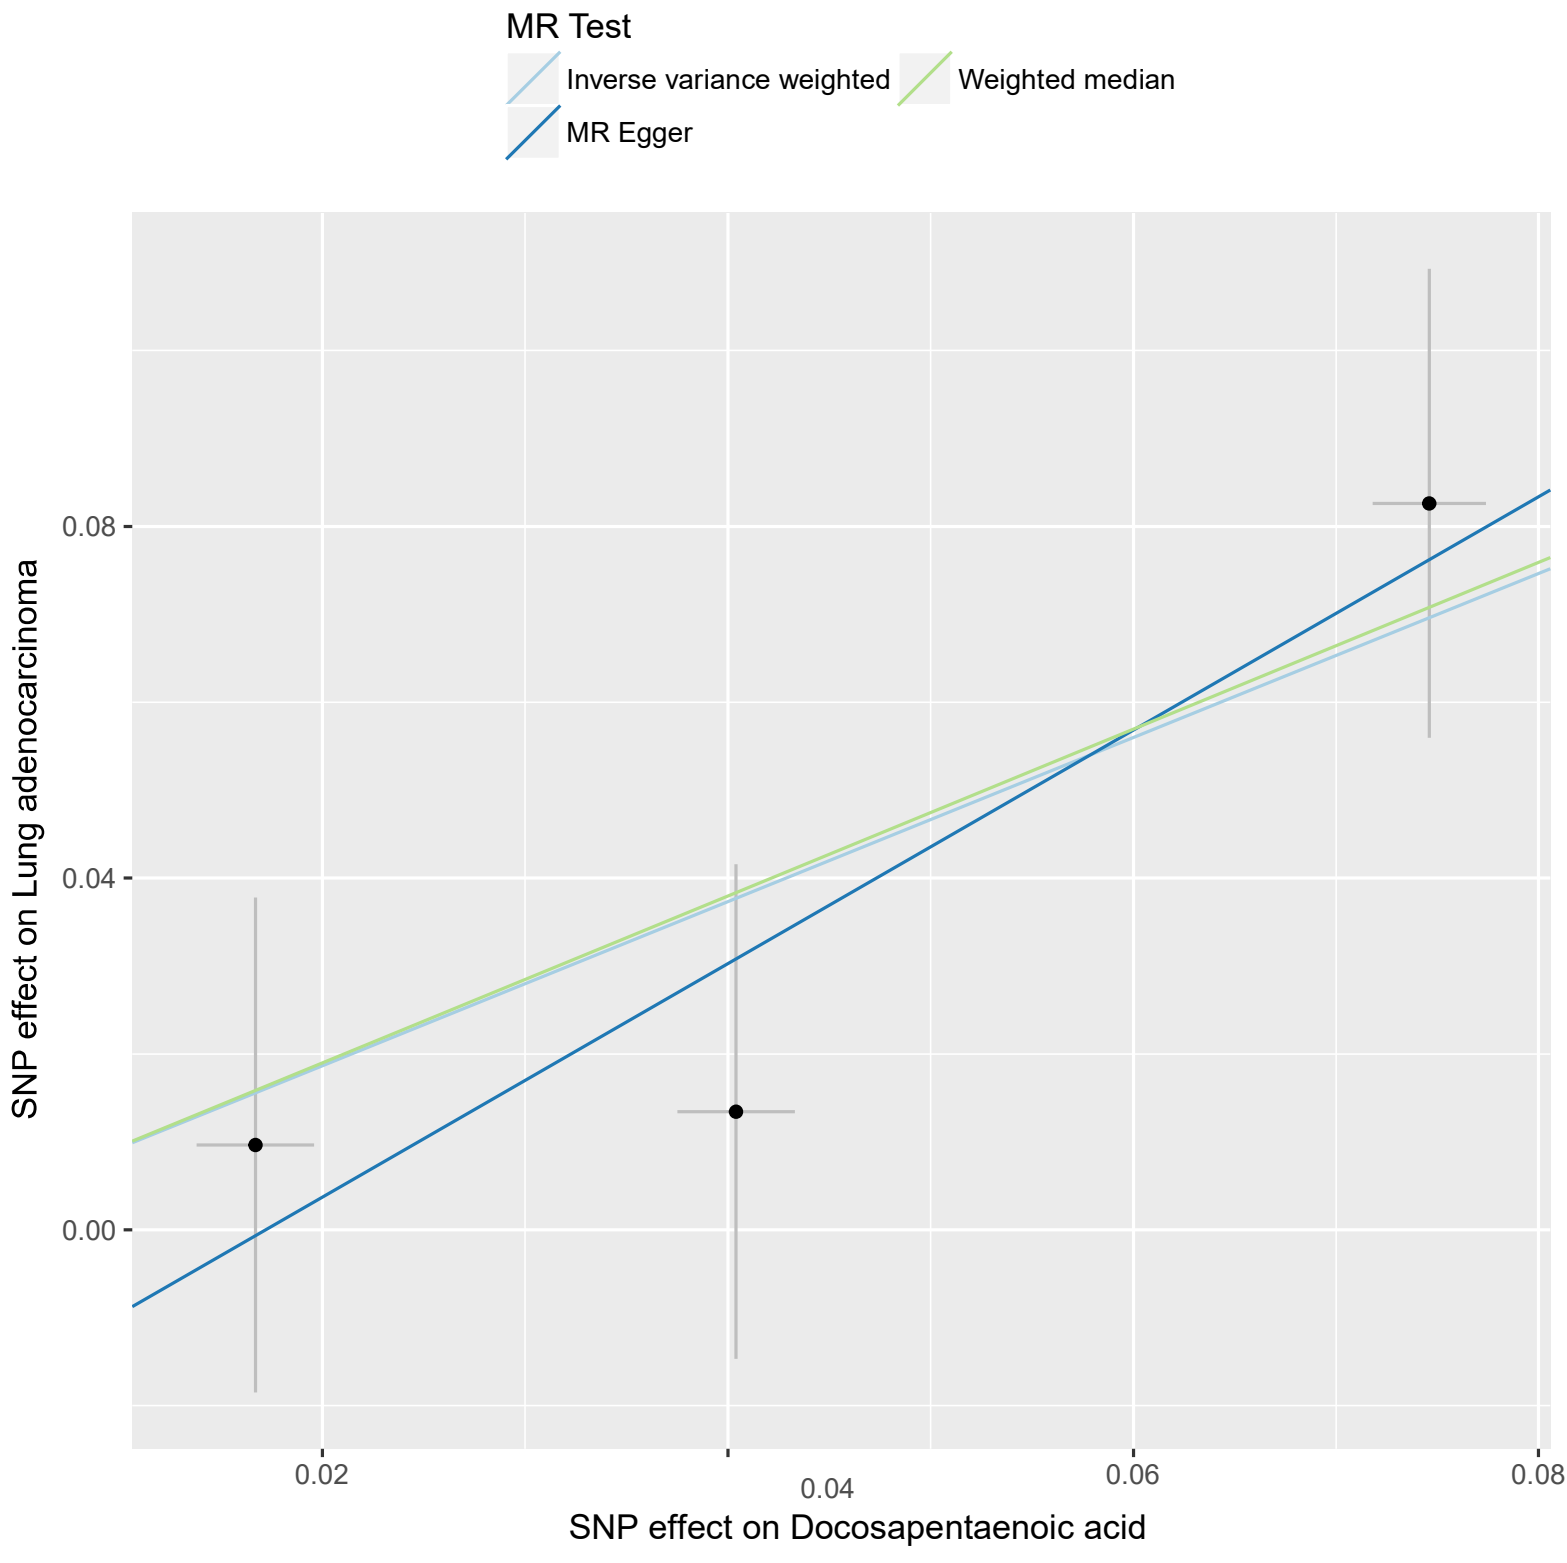

**Fig. S2.** Scatter plot of SNPs associated with DPA and their risk of lung adenocarcinoma.

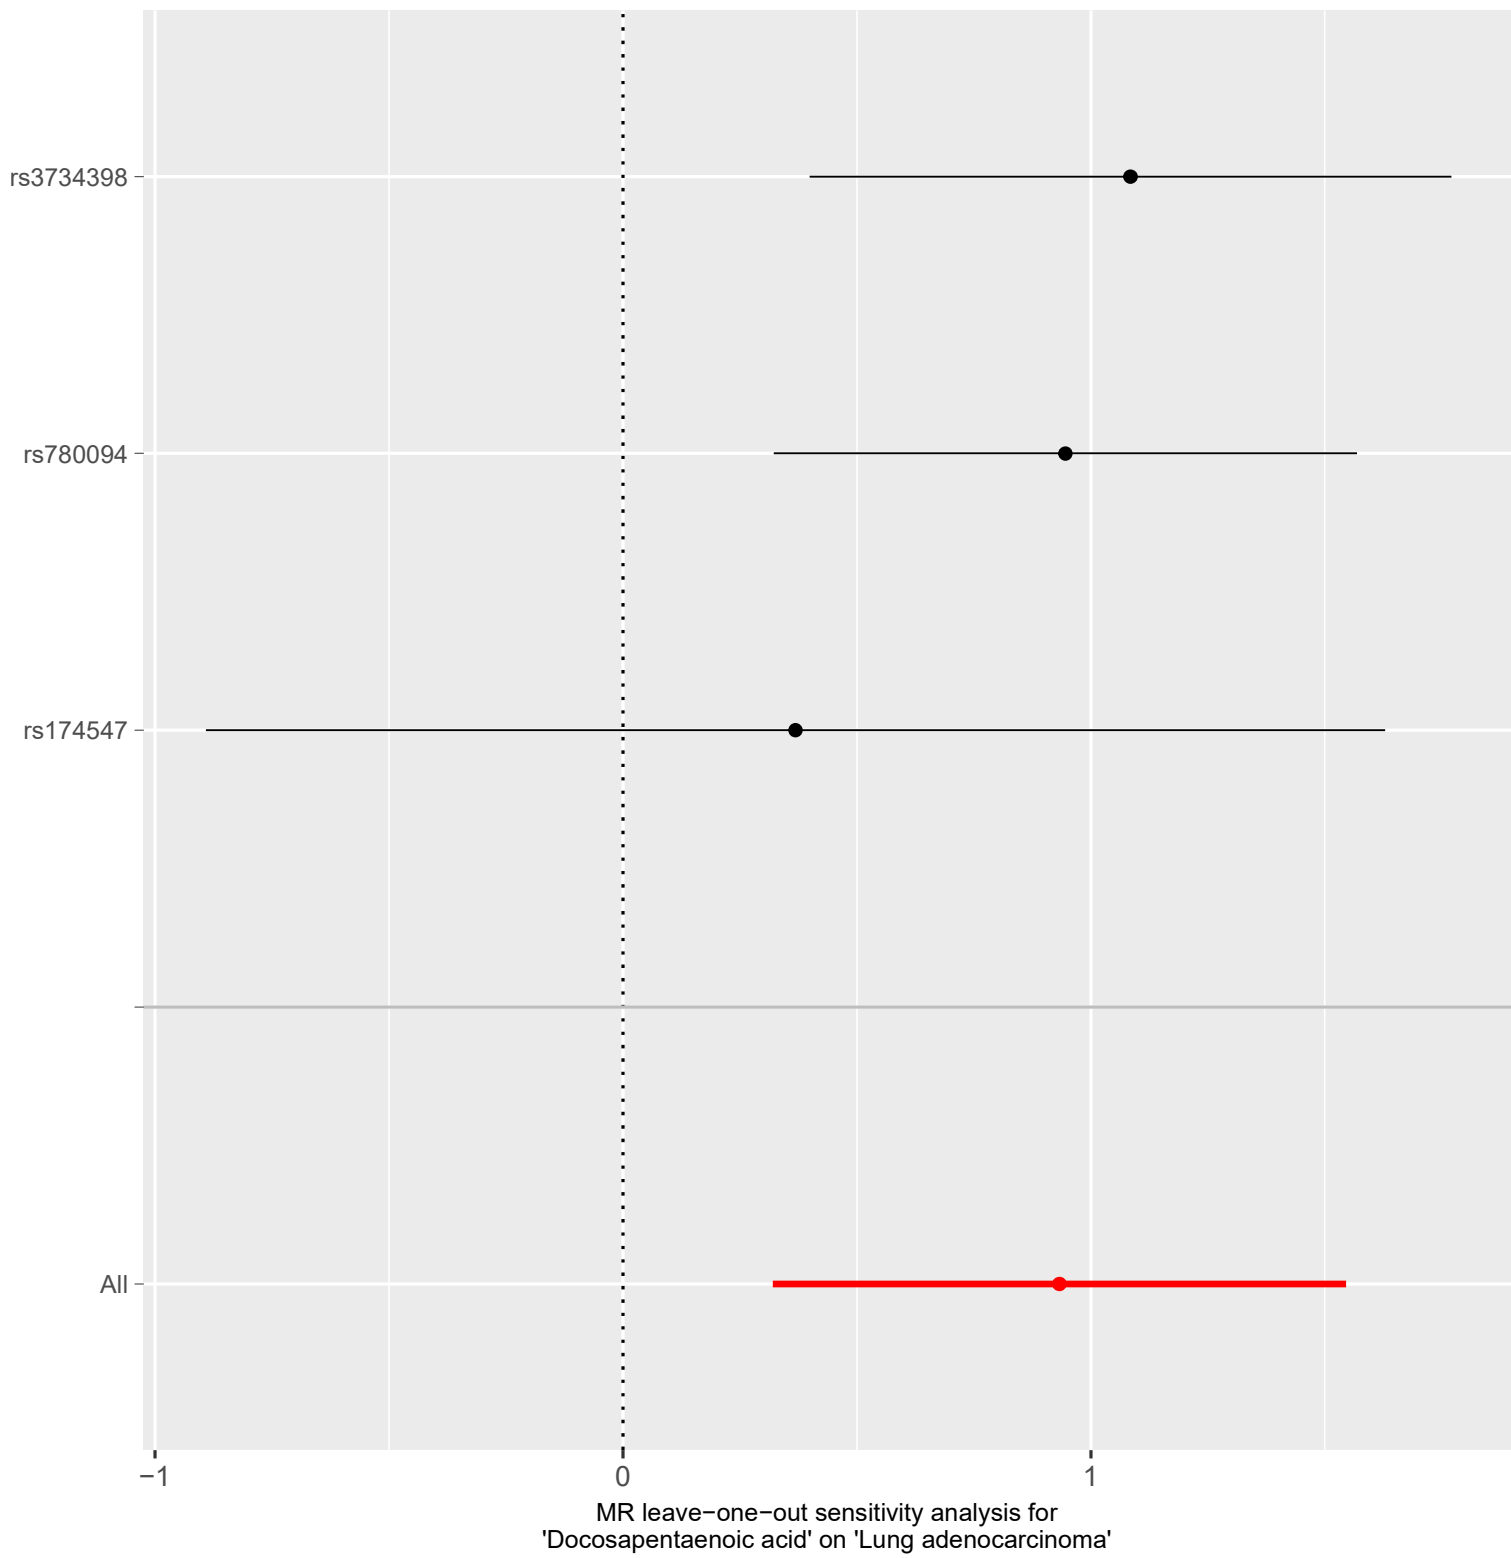

**Fig. S3.** Leave-one-out of SNPs associated with DPA and their risk of lung adenocarcinoma.

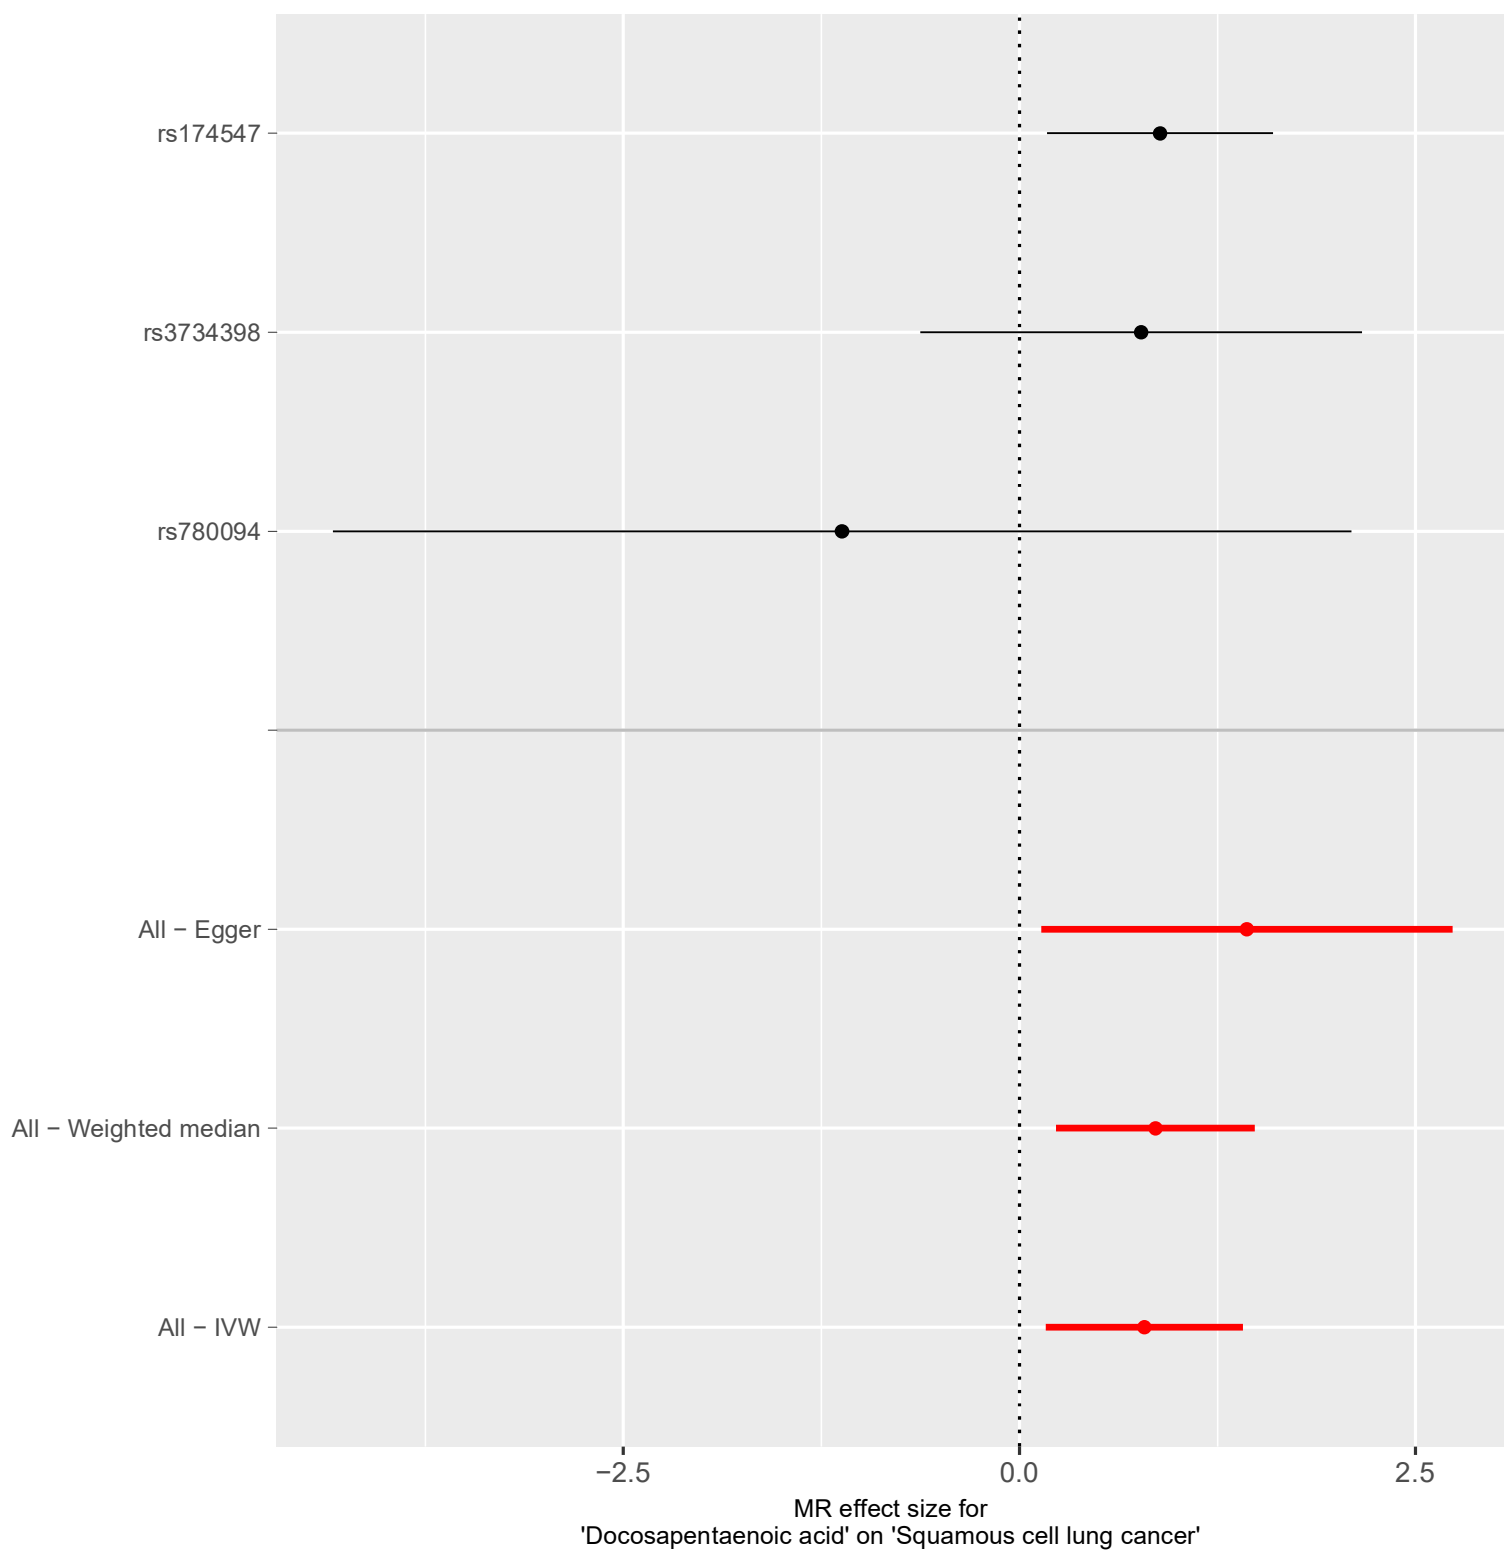

**Fig. S4.** Forest plot of SNPs associated with DPA and their risk of squamous cell lung cancer.

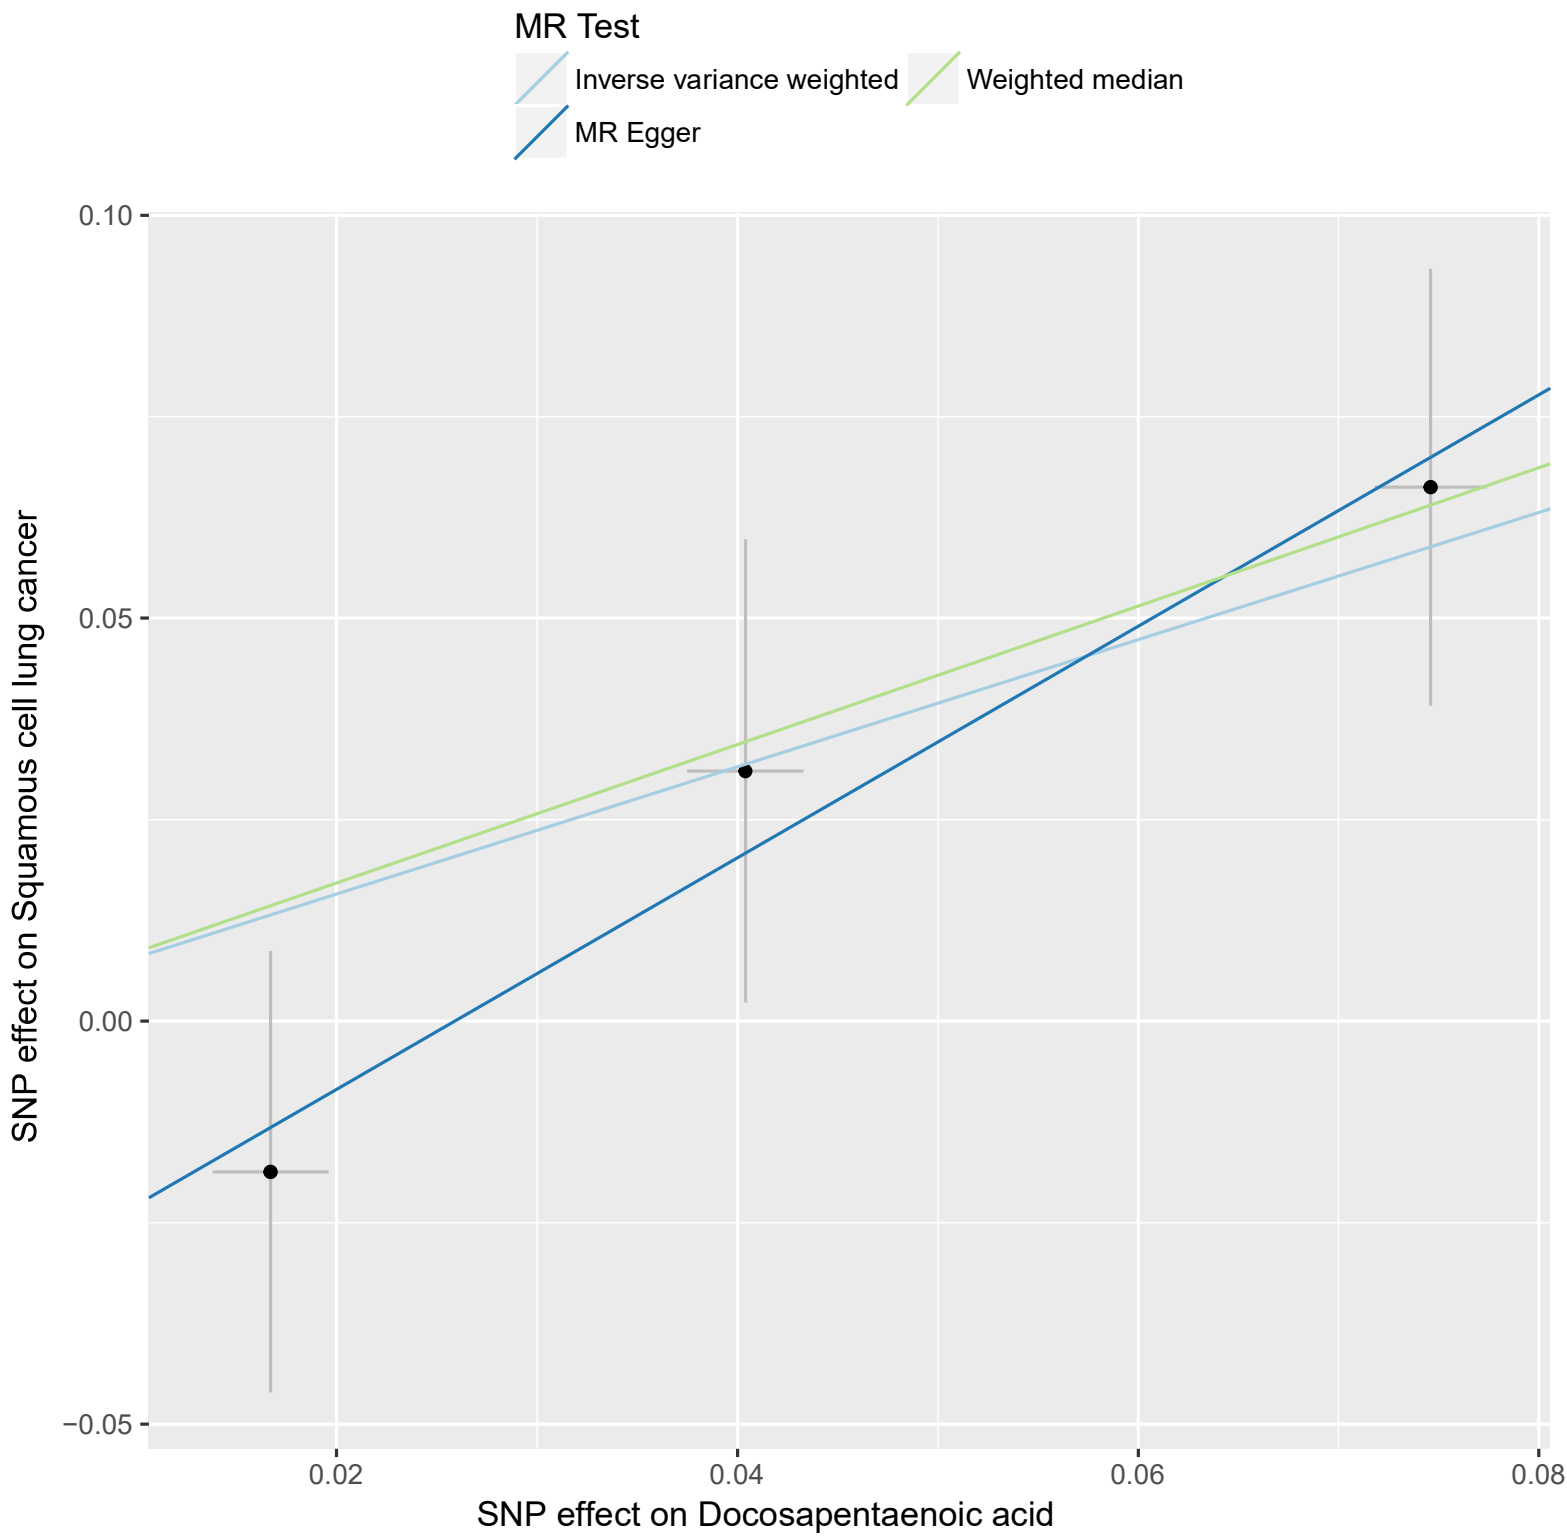

**Fig. S5.** Scatter plot of SNPs associated with DPA and their risk of squamous cell lung cancer.

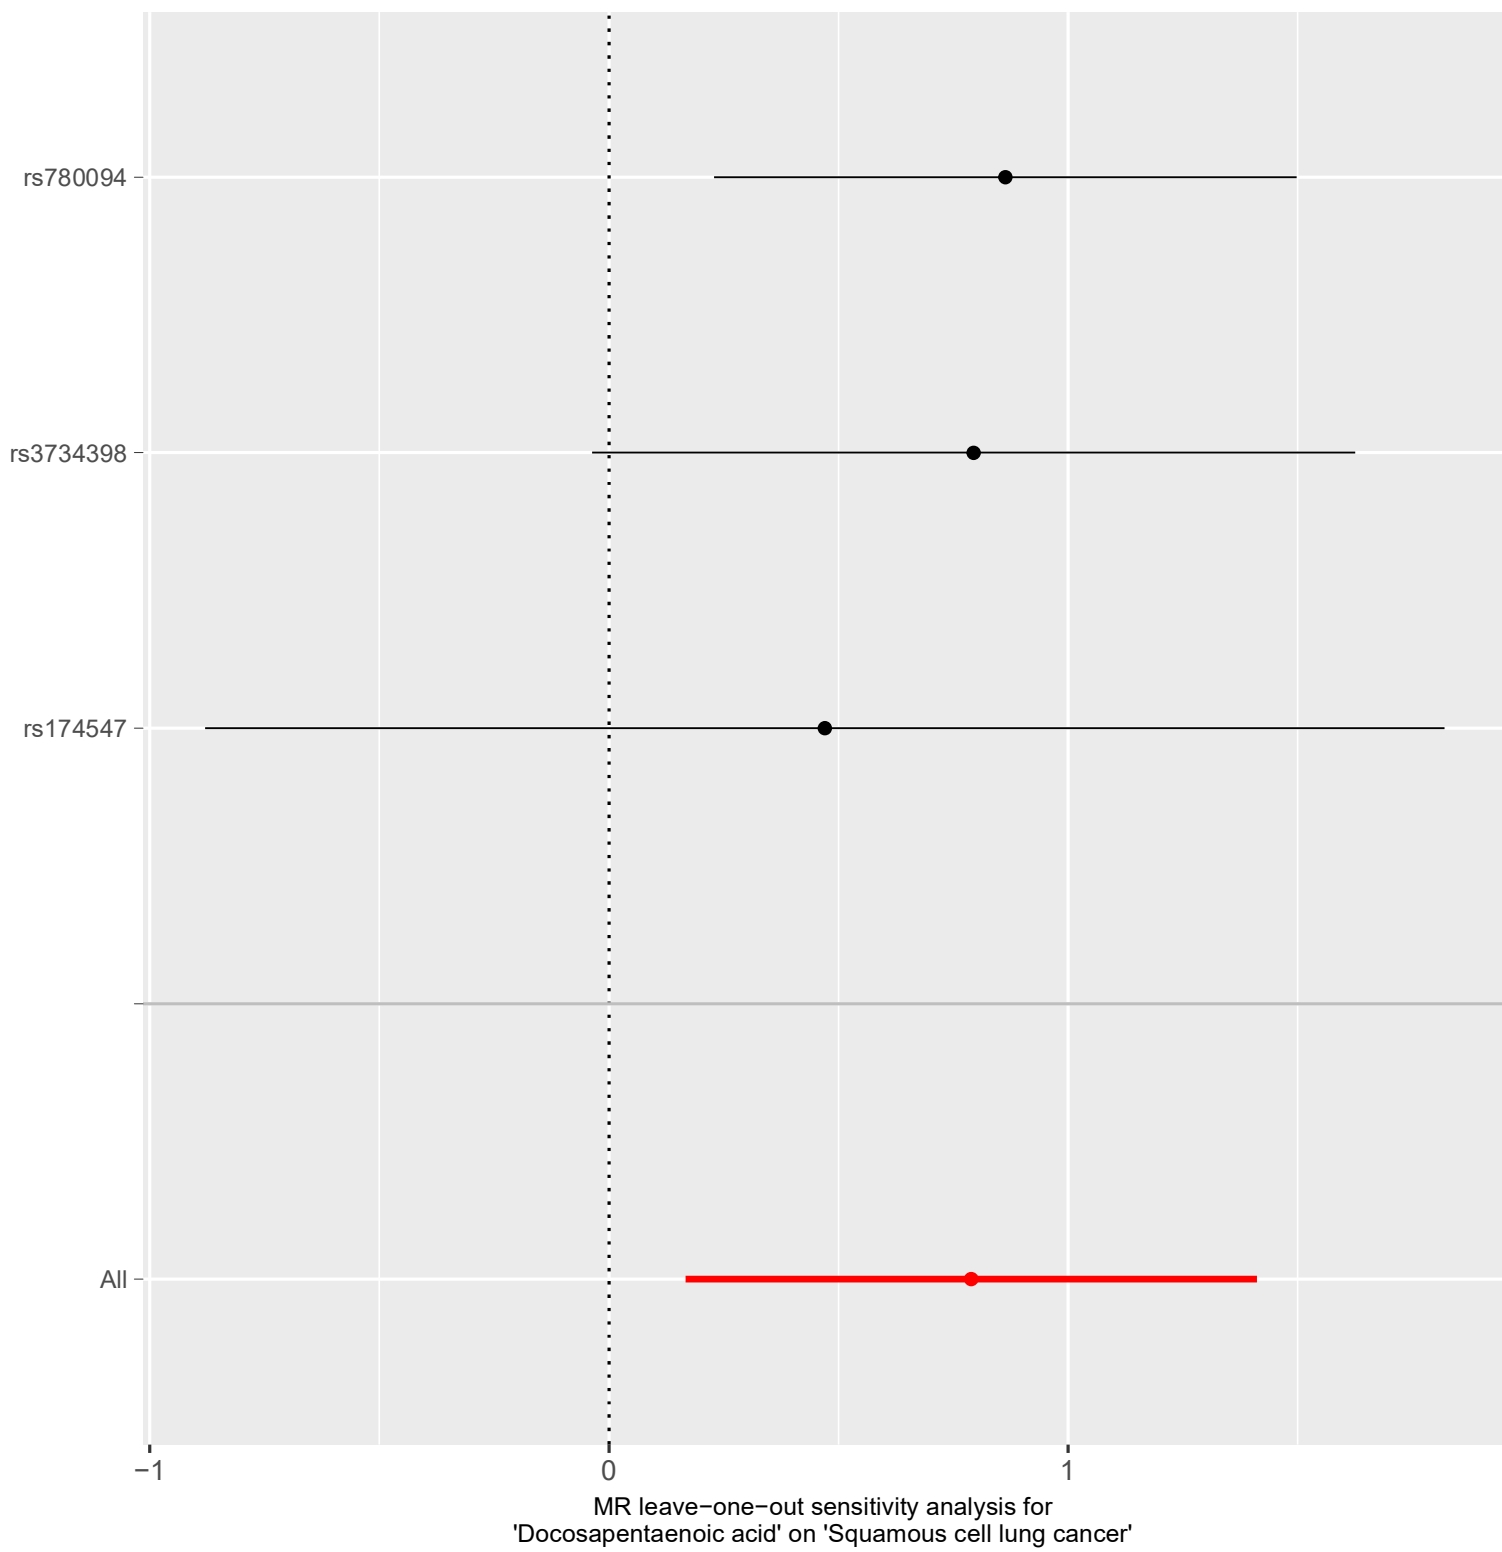

**Fig. S6.** Leave-one-out of SNPs associated with DPA and their risk of squamous cell lung cancer.

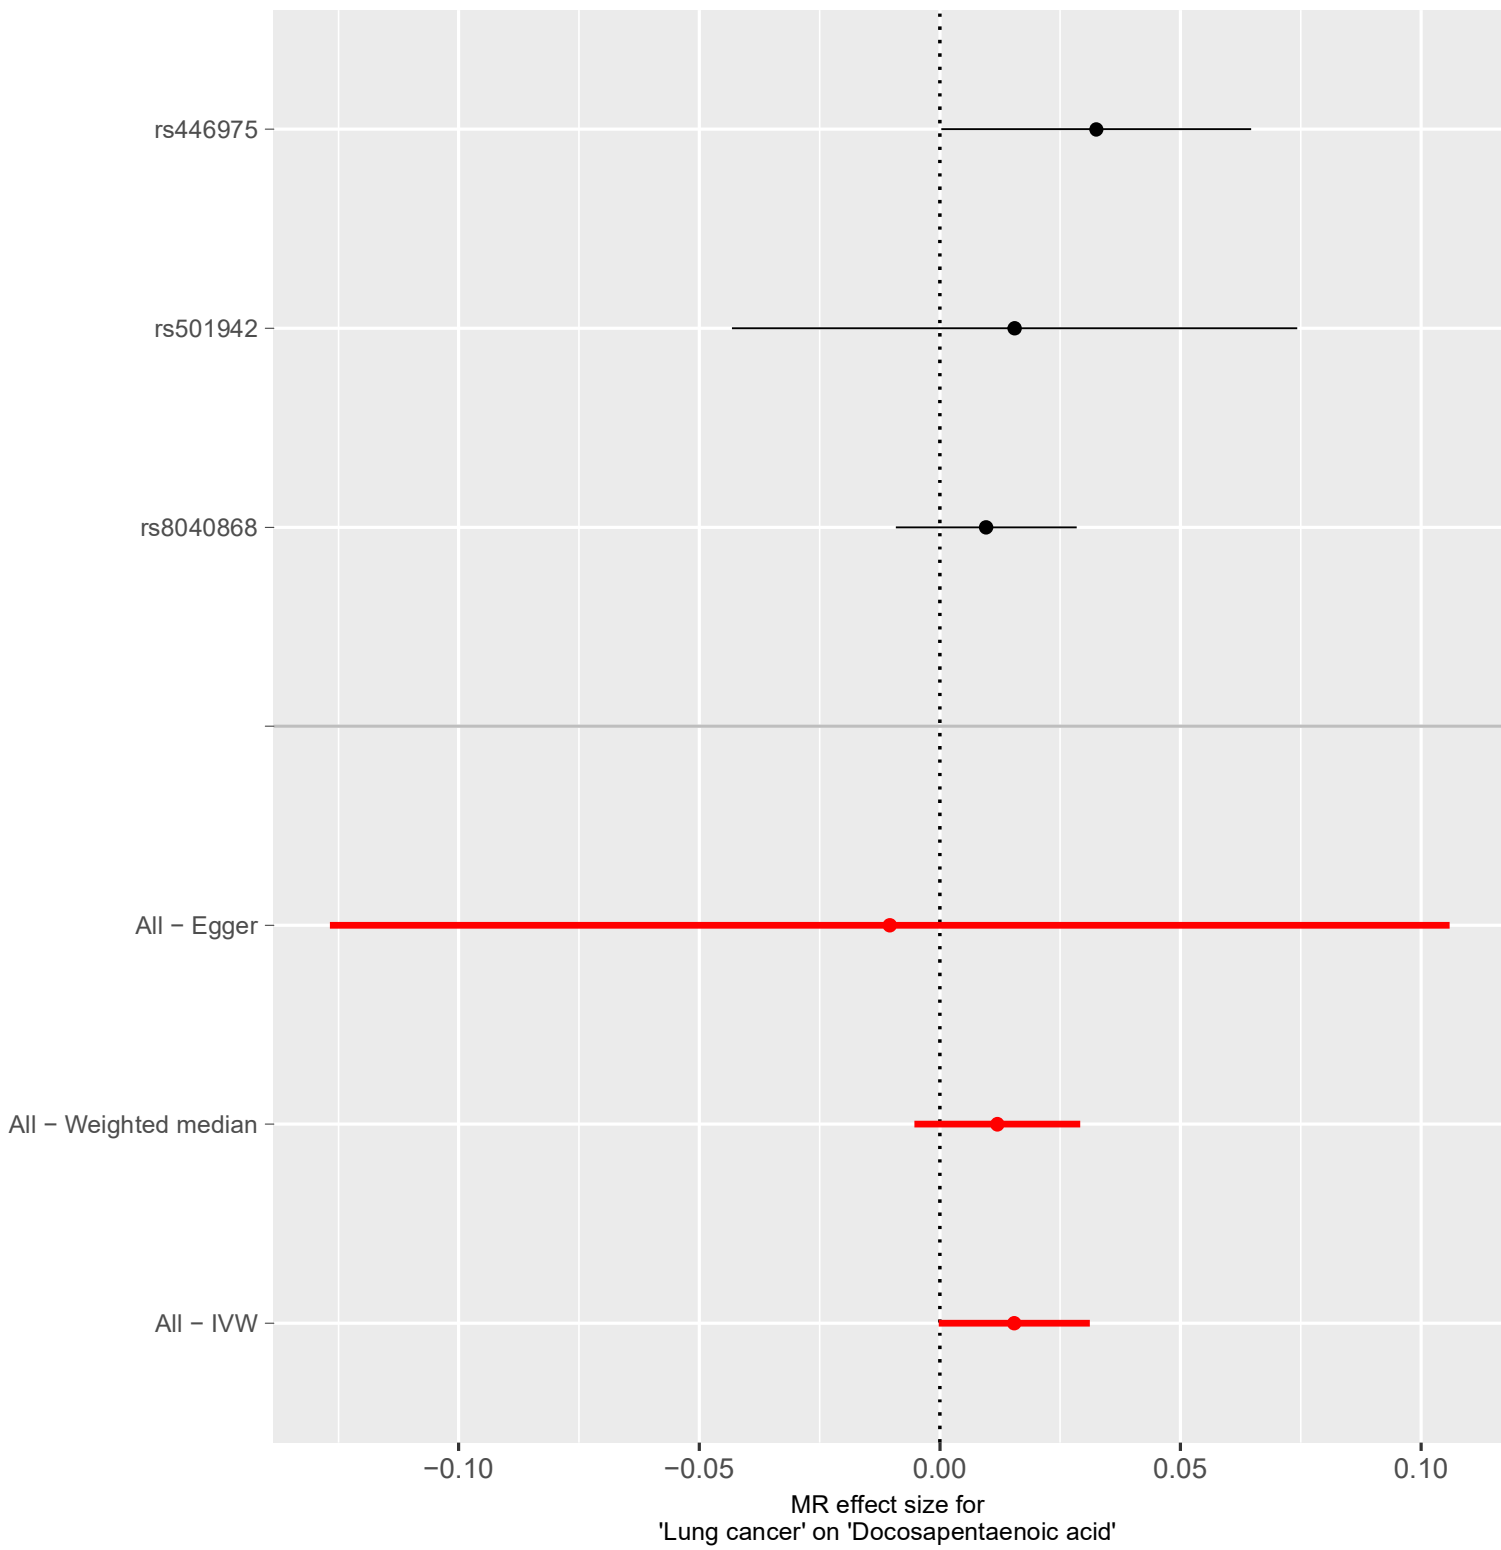

**Fig. S7.** Forest plot of SNPs associated with lung cancer and their risk of DPA.



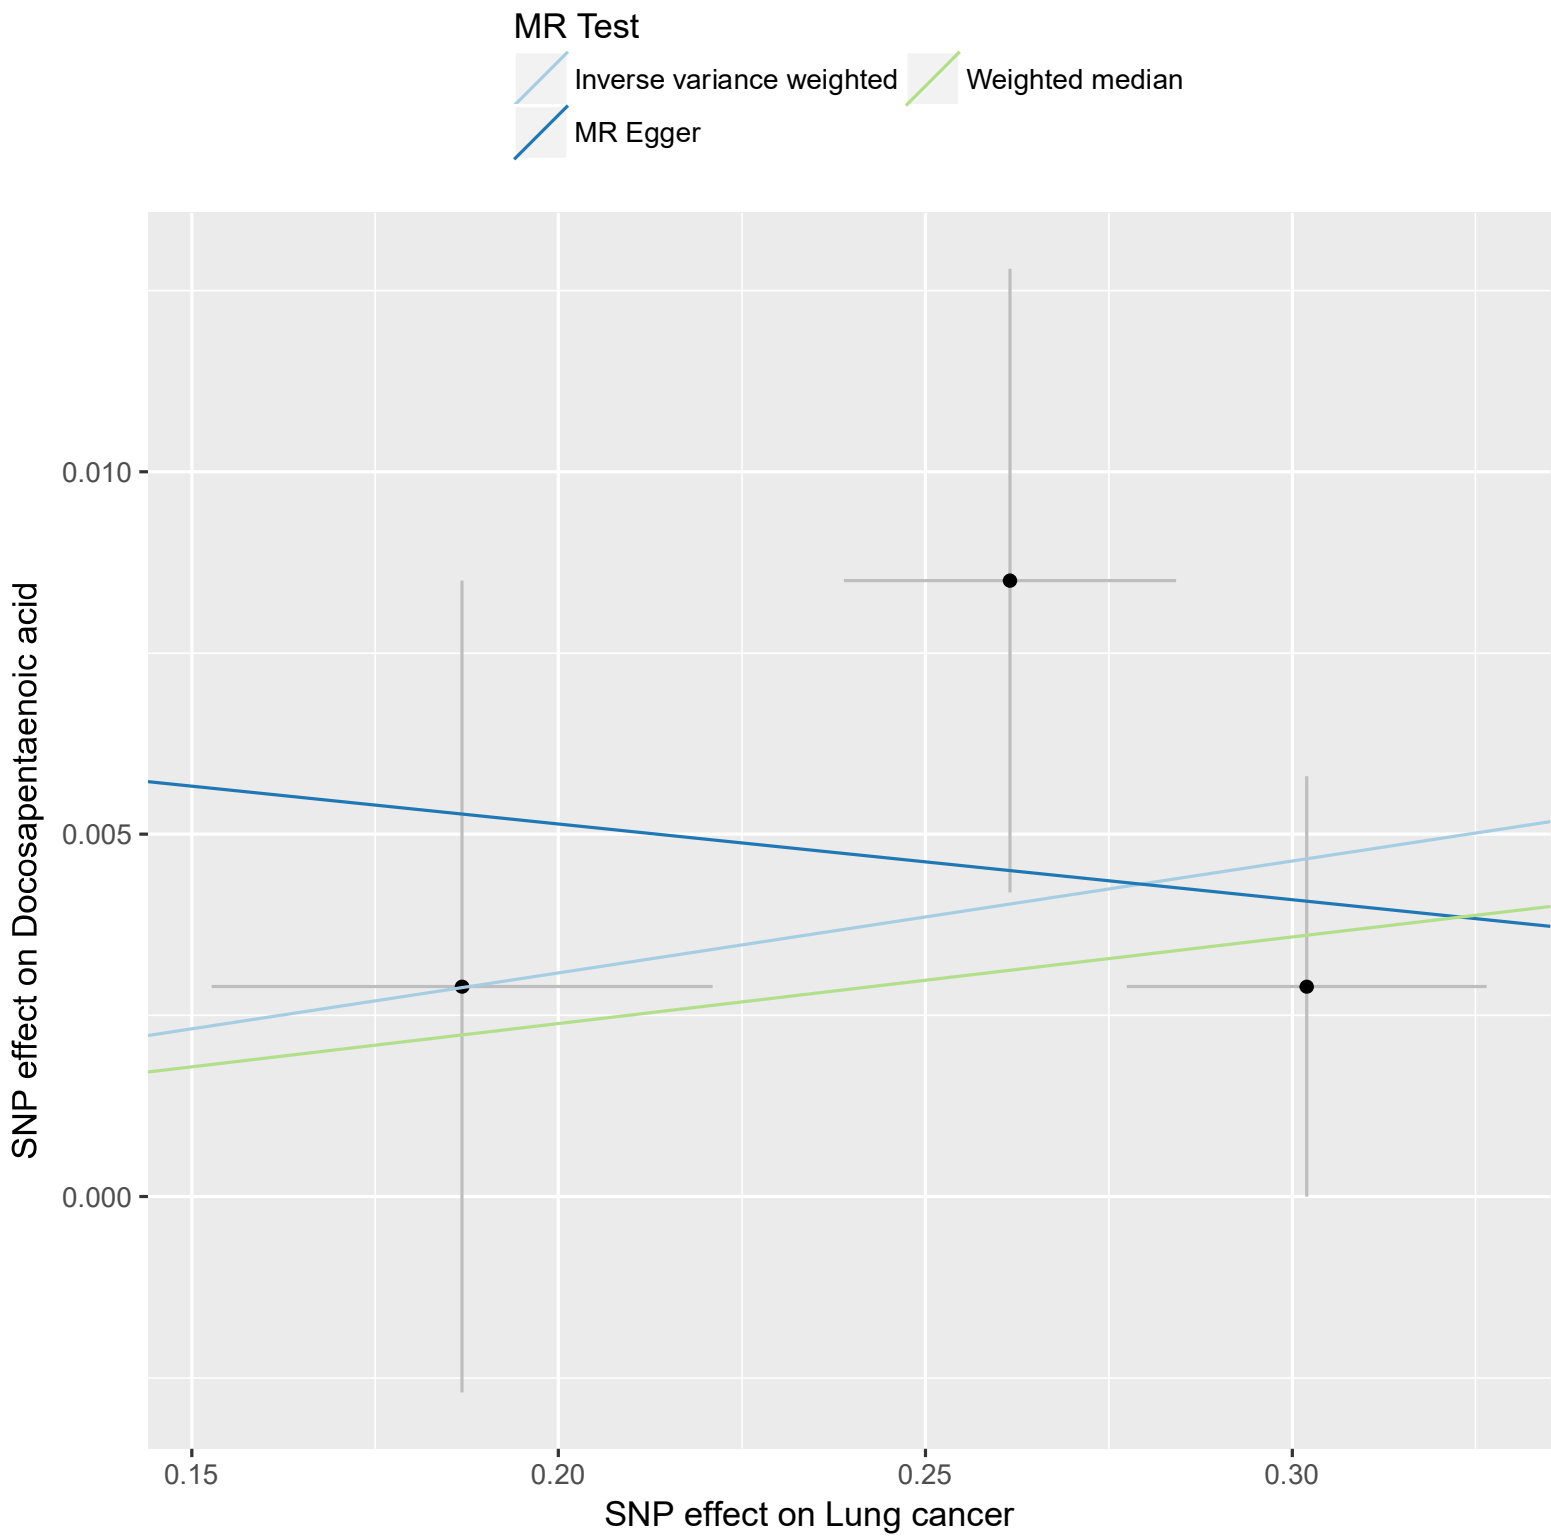

**Fig. S8.** Scatter plot of SNPs associated with lung cancer and their risk of DPA.

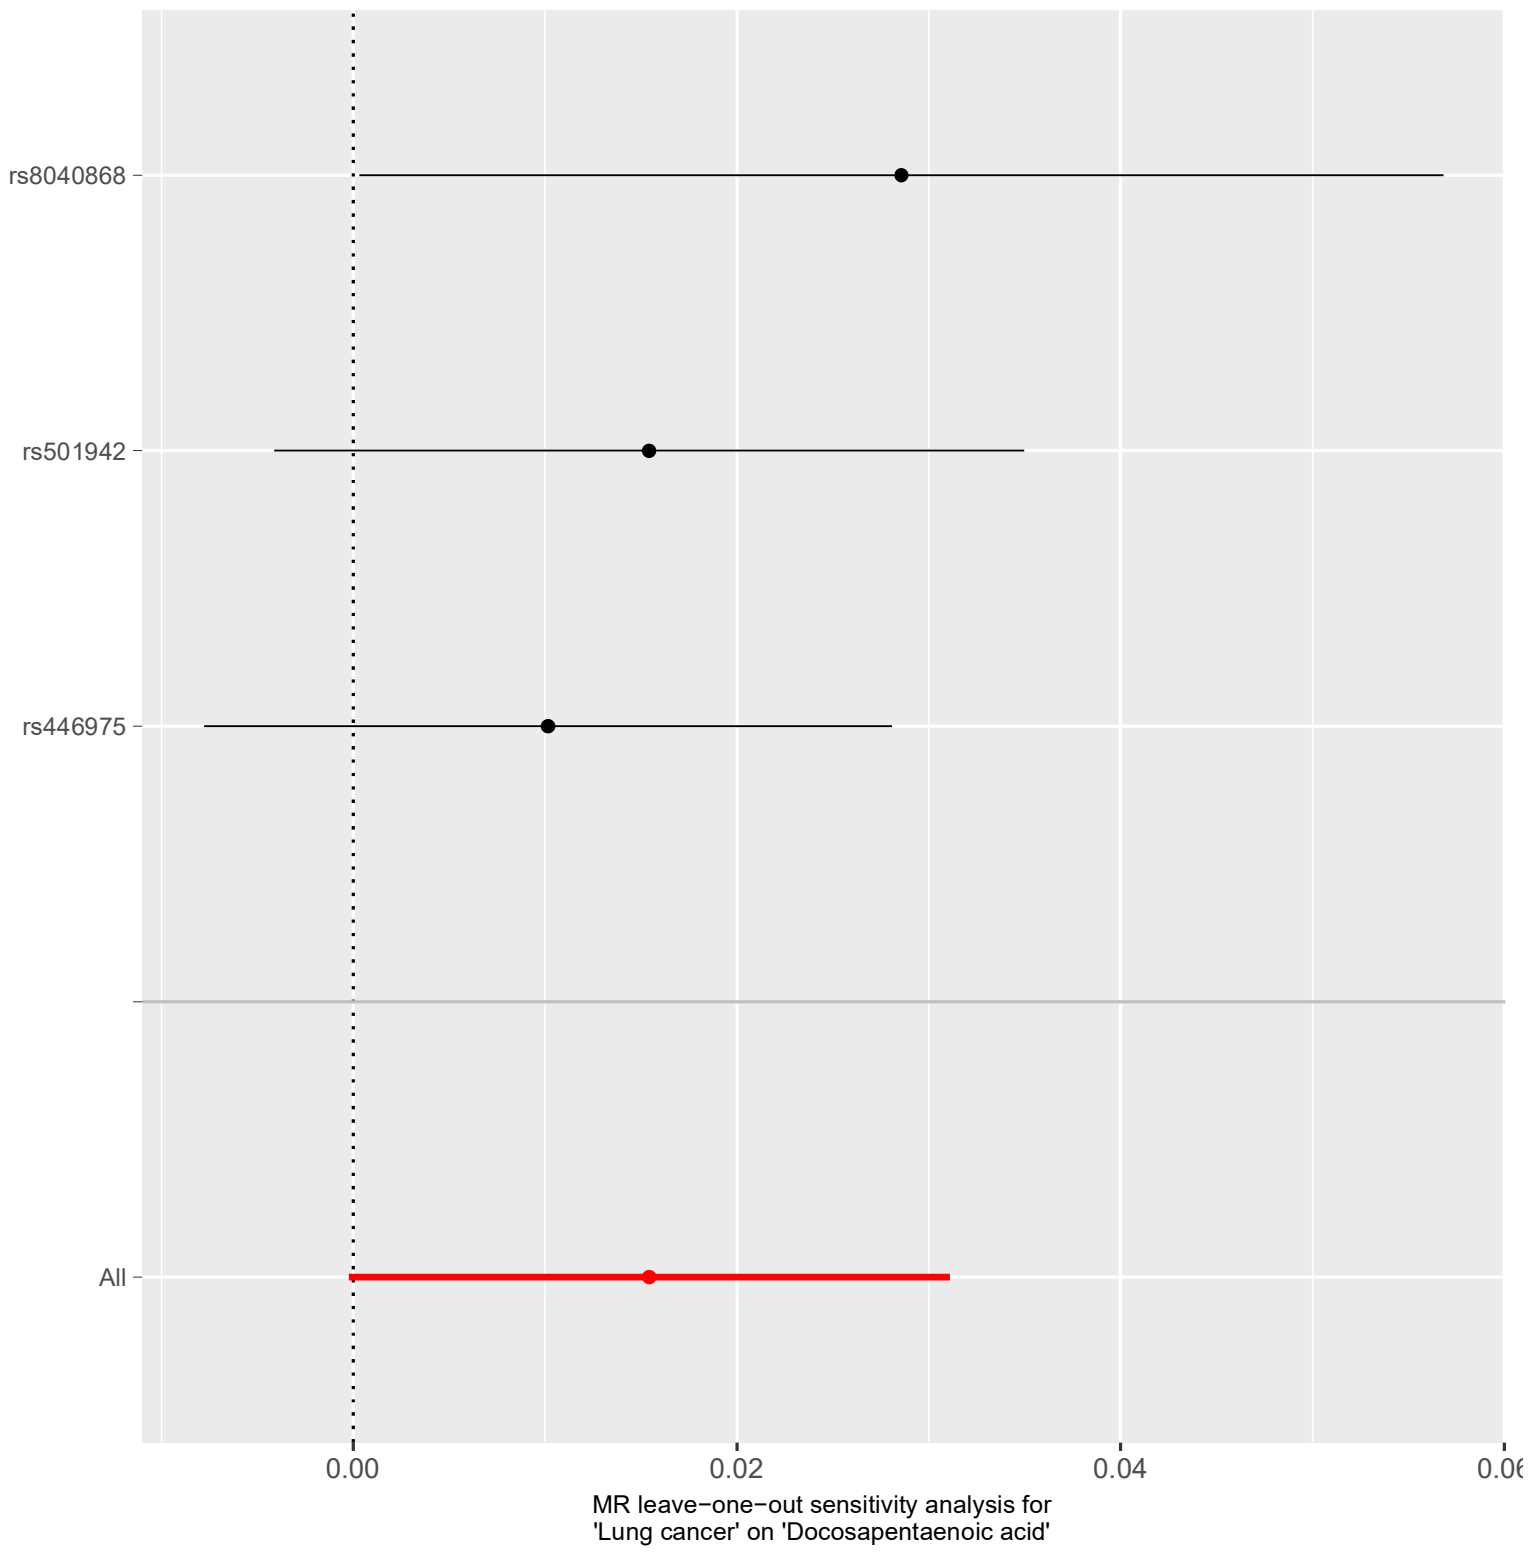

**Fig. S9.** Leave-one-out of SNPs associated with lung cancer and their risk of DPA.
